# Supplementary material
Source: publisher figshare collection journal article supplement (https://gsajournals.figshare.com/ndownloader/files/22851401)
Supplement: Supplementary file 1 [file 22851401]

**Figure S6. Pairwise nucleotide diversity within each population calculated for 10,000 permuted sets of scaffolds encompassing an area similar in size to the odd haplotype. Results in each population calculated for scaffolds containing the odd haplotype are shown in red color.**
